# Supplementary material for: ANGPTL4 deficiency in haematopoietic cells promotes monocyte expansion and atherosclerosis progression
Source: PubMed Central journal article supplement (PMC4974469; doi:10.1038/ncomms12313), 2016-07-27
Supplement: ncomms12313-s1.pdf [file ncomms12313-s1.pdf]

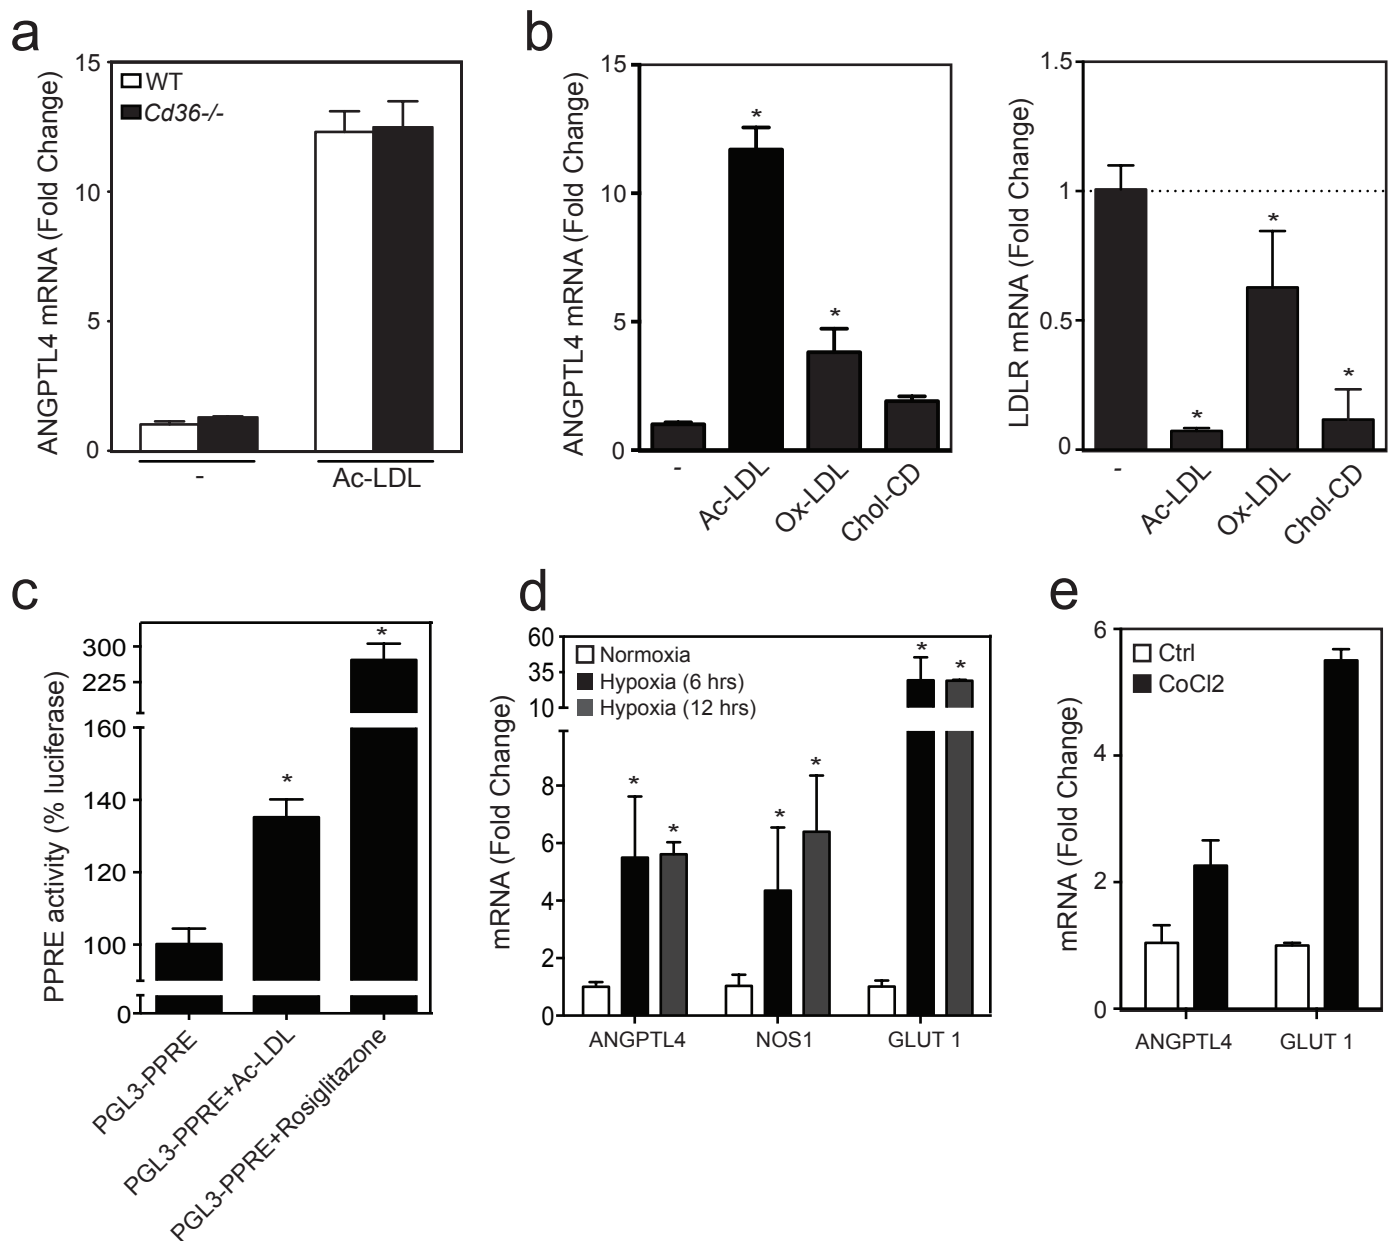

**Supplementary Fig. 1. ANGPTL4 expression in macrophages is regulated by PPARs and hypoxia.** (a) *Angptl4* mRNA expression in peritoneal macrophages from WT and *Cd36*<sup>-/-</sup> mice treated with or without Ac-LDL (120  $\mu$ g/ml) for 24 h. (b) *Angptl4* mRNA expression in mouse peritoneal macrophages with indicated treatments for 24 h. Right panel shows the expression of *Ldlr* as a control for cholesterol loading. (c) Luciferase activity assay in Raw 264.7 cells transfected with PPAR response element from mouse *Angptl4* linked to firefly luciferase reporter construct along with renilla luciferase vector and incubated with or without indicated treatments for 24 h. Rosiglitazone is used as a positive control for induction of PPAR activity. (d) *Angptl4* mRNA expression in mouse peritoneal macrophages incubated in hypoxic condition (1% O<sub>2</sub>) for indicated time points. *Glut1* and *Nos2* mRNA expression are used as positive controls for hypoxia. (e) mRNA expression of *Angptl4* in mouse peritoneal macrophages incubated with or without chemical inducer of hypoxia cobalt chloride (CoCl<sub>2</sub>) for 12 h. *Glut1* expression is used as a positive control for CoCl<sub>2</sub> treatment. All data represent the mean  $\pm$  SEM and are representative of 3 experiments in duplicate. \*P  $\leq$  0.05, Student's t-test.

## Supplementary Figure 2

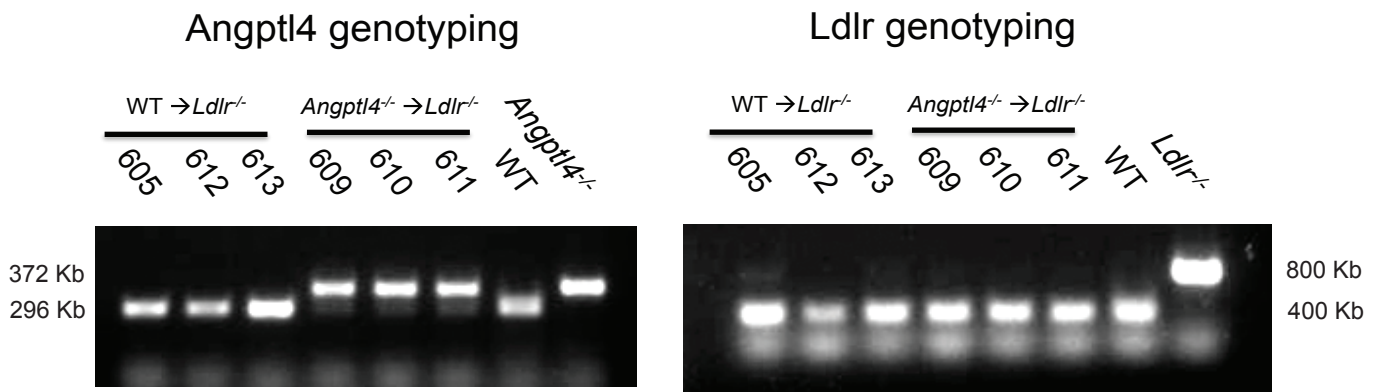

**Supplementary Fig. 2. Genotyping of Ldlr<sup>-/-</sup> chimeras with WT or Angptl4<sup>-/-</sup> BM.** PCR amplification of Angptl4 (left panel) and Ldlr (right panel) genes. Genomic DNA prepared from peripheral blood of Ldlr<sup>-/-</sup> chimeras with WT or Angptl4<sup>-/-</sup> BM were amplified using specific primers for Angptl4 or Ldlr. In each panel, lanes 1, 2, and 3 are from Ldlr<sup>-/-</sup> chimeras with WT BM, lanes 4, 5, and 6 are from Ldlr<sup>-/-</sup> chimeras with Angptl4<sup>-/-</sup> BM, lane 7 is from WT and lane 8 from Angptl4<sup>-/-</sup> (left) or Ldlr<sup>-/-</sup> (right).

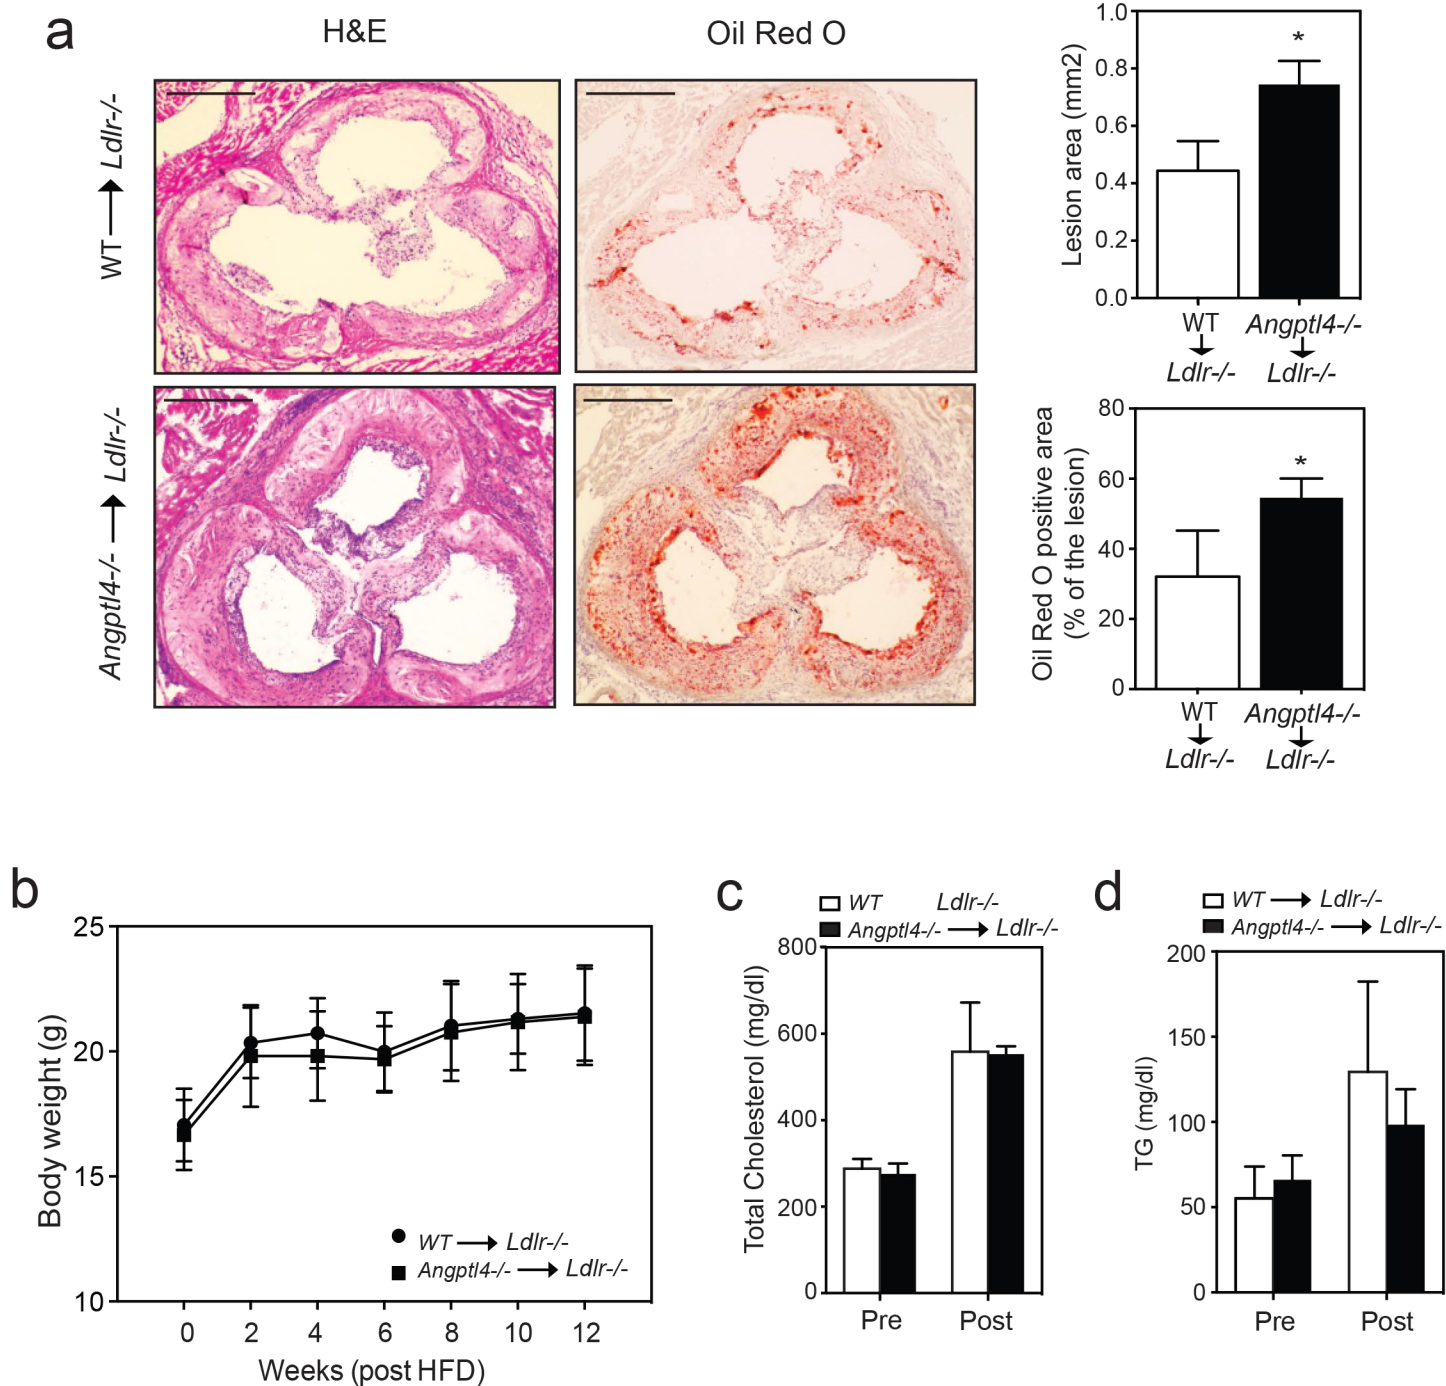

**Supplementary Fig. 3. Angptl4<sup>-/-</sup> bone marrow recipient female Ldlr<sup>-/-</sup> mice develop bigger atherosclerotic plaques.**

(a) Representative histological analysis of cross-sections of the aortic sinus from female Ldlr chimeras with WT or Angptl4<sup>-/-</sup> bone marrow (BM) after 12 weeks of WD stained with H&E and Oil Red O. Quantification is shown in the right panel of respective figure (mean ± SEM; n=10 per group; \*P<0.05, Student's t-test). Total circulating cholesterol (b), plasma triglyceride level (c) and body weight (d) of female Ldlr<sup>-/-</sup> chimeras with WT or Angptl4<sup>-/-</sup> BM before and after 12 weeks on WD (mean ± SEM; n=10 per group). Scale bars = 400 μm.

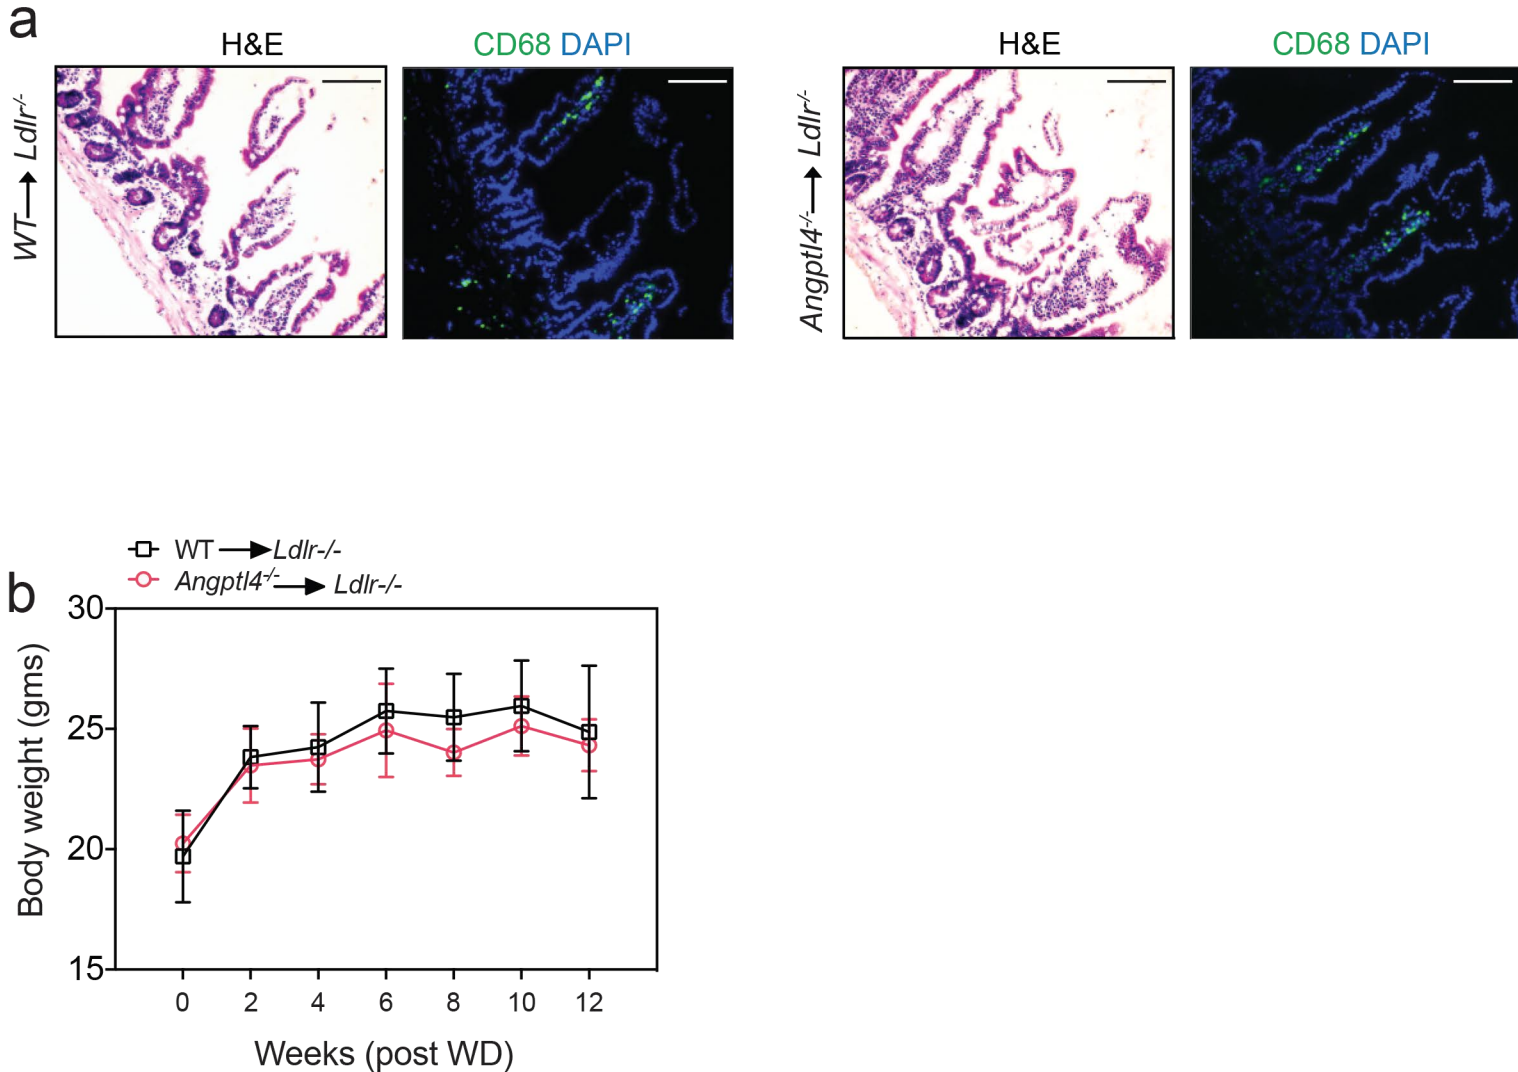

**Supplementary Fig. 4. Hematopoietic *Angptl4* deficiency does not influence gut inflammation and body weight in *Ldlr*<sup>-/-</sup> mice.** (a) Representative histological analyses of cross-section of the ileum from *Ldlr*<sup>-/-</sup> chimeras with WT and *Angptl4*<sup>-/-</sup> BM stained with H&E and CD68 after 12 weeks on WD. Scale bars: 400  $\mu$ m. (b) Body weight of male *Ldlr*<sup>-/-</sup> chimeras with WT or *Angptl4*<sup>-/-</sup> BM before and after 12 weeks on WD (mean  $\pm$  SEM; n=9 per group).

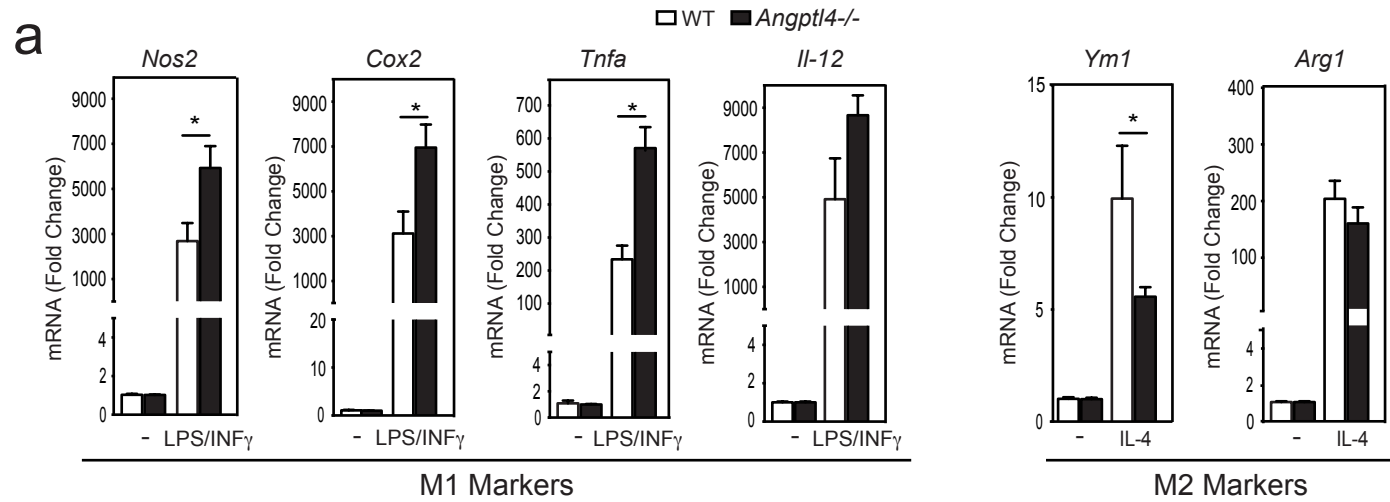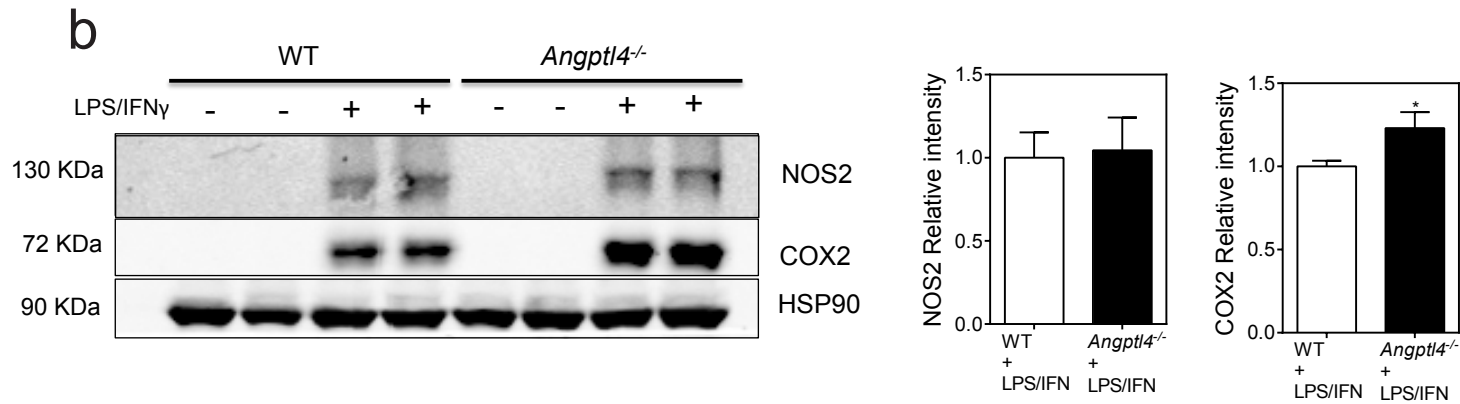

**Supplementary Fig. 5. ANGPTL4 deficiency promotes M1 polarization of macrophages.** (a) mRNA expression of indicated M1 and M2 macrophage polarization genes in bone marrow derived macrophages (BMDM) isolated from WT and *Angptl4*<sup>-/-</sup> mice and treated with LPS/IFN $\gamma$  (M1) or IL-4 (M2) for 8 h (mean  $\pm$  SEM,  $n > 3$ ; \* $P < 0.05$ , Student's t-test). (b) Western blot analysis of indicated proteins from WT and *Angptl4*<sup>-/-</sup> BMDMs treated with LPS/IFN $\gamma$ . (c) Western blot analysis of indicated proteins from WT and *Angptl4*<sup>-/-</sup> BMDMs treated with LPS/IFN $\gamma$  for indicated time points. Quantifications are shown in the lower panels. Full scans of Westerns blots are provided in Supplementary Fig. 9.

## Supplementary Figure 6

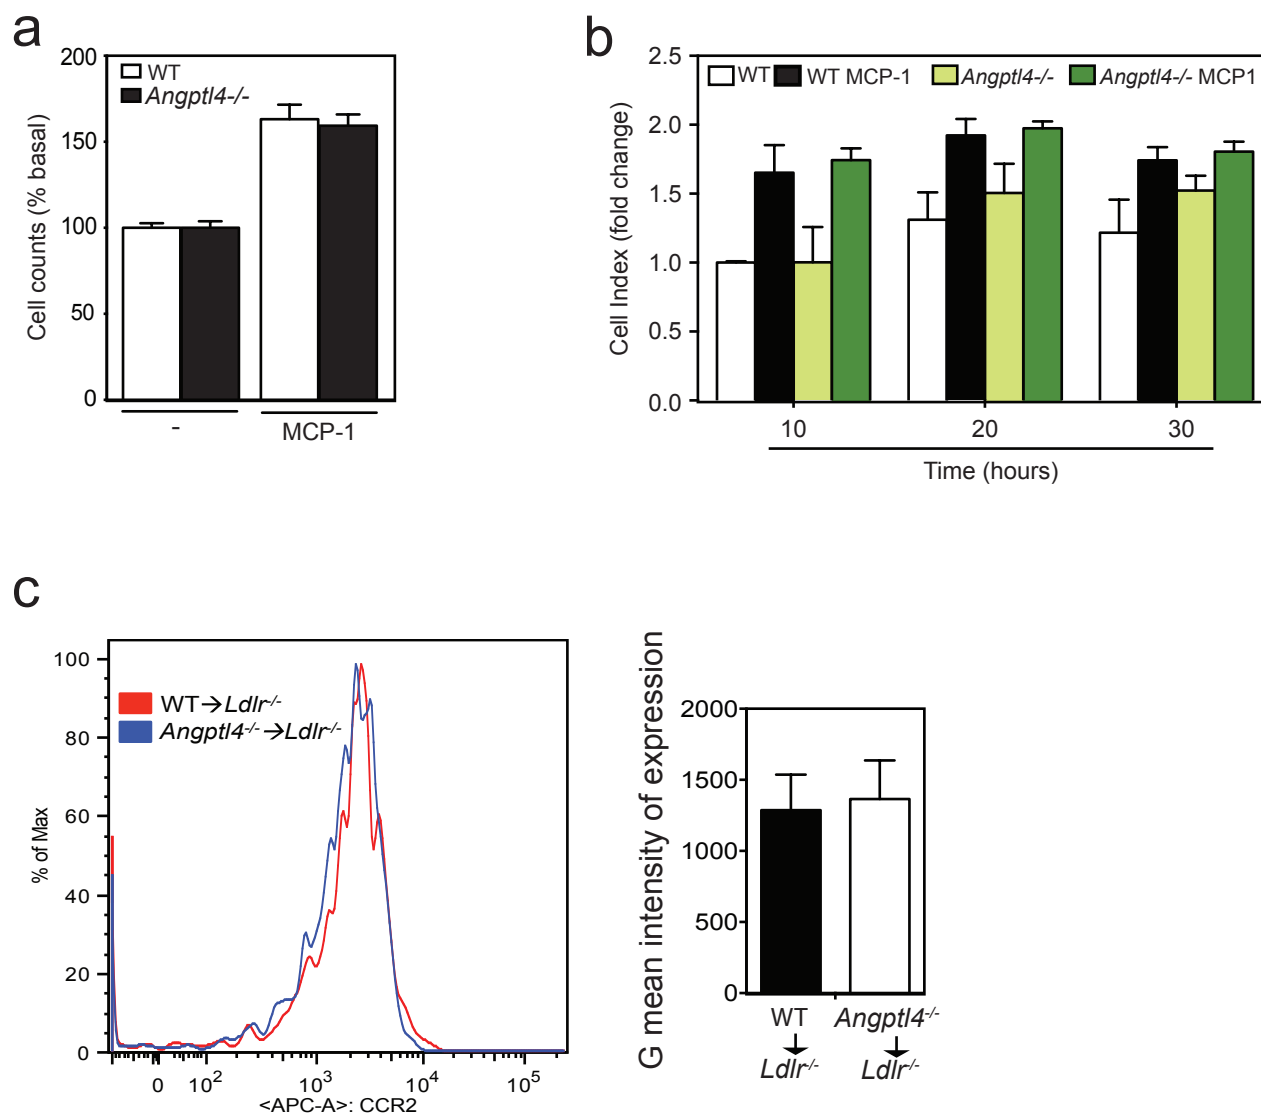

**Supplementary Fig. 6. ANGPTL4 deficiency does not influence monocyte migration.** (a and b) Migration of BMDMs from adult WT or *Angptl4*<sup>-/-</sup> mice towards MCP-1 (100 ng/ml) using Boyden chamber assay after 16 hours of incubation (mean ± SEM; n=4 in duplicates) (a) and Real-time Cell Invasion and Migration (RT-CIM) x CELLigence assay system (mean ± SEM; n=3 in quadruplicates) (b). (c) Representative histogram of the flow cytometry analysis of CCR2 expression in blood monocytes isolated from *Ldlr*<sup>-/-</sup> mice transplanted with WT and *Angptl4*<sup>-/-</sup> BM and put on WD for 3 months. Quantification of geometric mean intensity from all experiments is on the right panel (mean ± SEM; n=5 per group).

## Supplementary Figure 7

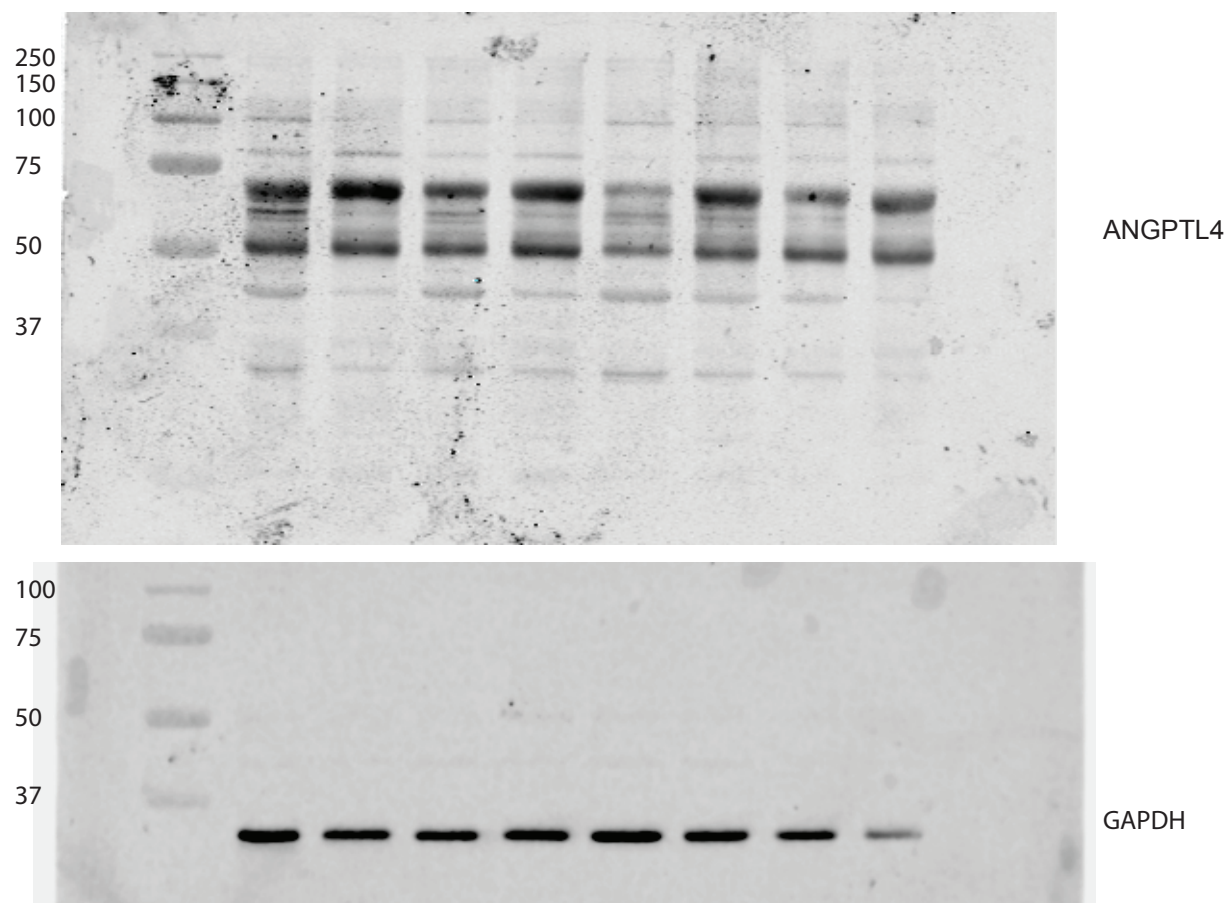

Supplementary Figure 7. Original gel scans for Fig. 1h

# Supplementary Figure 8

**Fig 7f, original western blots**

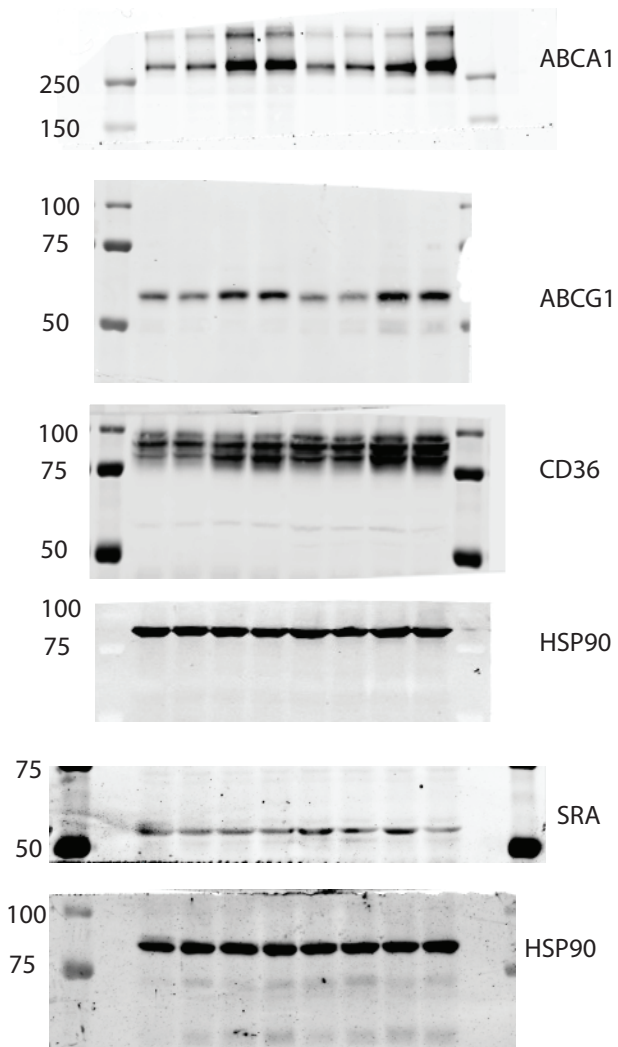

**Fig 7g, original western blots**

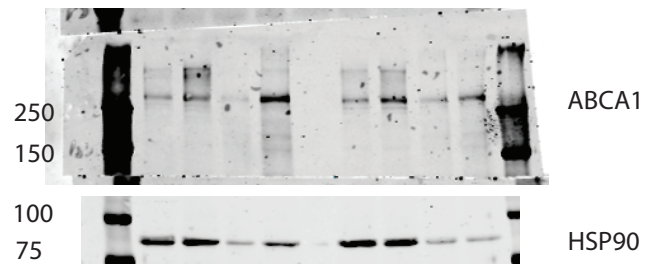

**Supplementary Figure 8. Original gel scans for Fig. 7f and Fig 7g**



Supplementary Figure 9

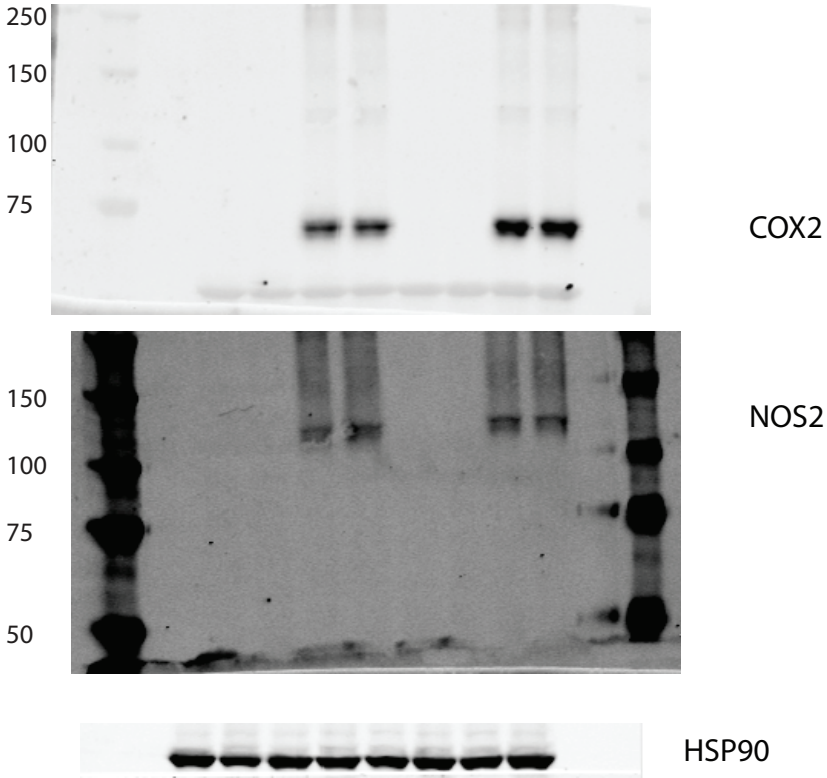

Supplementary Figure 9. Original gel scans for Supplemental Fig. 5b

**Supplementary Table 1**

***Mouse primer sequence***

| <b>Primer</b>  | <b>Forward sequence</b>          | <b>Reverse sequence</b>        |
|----------------|----------------------------------|--------------------------------|
| <b>18S</b>     | 5'-ttccgataacgaacgagactct-3'     | 5'-tggctgaacgccacttgtc-3'      |
| <b>Angptl4</b> | 5'-caccaatggttcccccaat-3'        | 5'-aagatacccttttacgctcctg-3'   |
| <b>Ear2</b>    | 5'-gtggccctcaccgagtatg-3'        | 5'-ggctcgcgatgggtgtcttg-3'     |
| <b>F7</b>      | 5'-aaaggcgtgccaactcactc-3'       | 5'-cctacgttctgacatggattcg-3'   |
| <b>Syn1</b>    | 5'-agctcaacaaatcccagttct-3'      | 5'-cggatggctcagctttcac-3'      |
| <b>Igf1</b>    | 5'-gcattgtggatgagtggtgc-3'       | 5'-ggctcctctacattctgta-3'      |
| <b>Lipn</b>    | 5'-gggtacattctcgccatcaac-3'      | 5'-ctcaagccagtaggcattgtc-3'    |
| <b>Adssl1</b>  | 5'-ctcacctgtgttcgacttcc-3'       | 5'-agcaaagcccttgagcctttt-3'    |
| <b>Adam8</b>   | 5'-agttctgtttatgccccaaag-3'      | 5'-aaaggttgcttgacctgct-3'      |
| <b>Hyal1</b>   | 5'-cctcaaccctgccagtttctc-3'      | 5'-cccgttgtcacaccactt-3'       |
| <b>Acca2</b>   | 5'-ctgctacgaggtgtgttcac-3'       | 5'-agctctgcatgacattgcc-3'      |
| <b>Abca1</b>   | 5'-ggtttgagatggtatacaatggt-3'    | 5'-cccggaaacgcaagtcc-3'        |
| <b>Abcg1</b>   | 5'-tcaccagttctgcatcctt-3'        | 5'-gcagatgtgcaggaccgagt-3'     |
| <b>Cd36</b>    | 5'-tcctctgacattgcagggtctatc-3'   | 5'-aaaggcattggctggaagaa-3'     |
| <b>Ldlr</b>    | 5'-gggtactggcaaccaccattggg-3'    | 5'-gccaatcgactcacgggttcag-3'   |
| <b>Nos2</b>    | 5'-cagctgggctgtacaaacctt-3'      | 5'-cattggaagtgaagcgtttcg-3'    |
| <b>Glut1</b>   | 5'-cagttcggctataaacactggg-3'     | 5'-gccccgcagagagaagatg-3'      |
| <b>Cox-2</b>   | 5'-acctctccaccaatgacgtg-3'       | 5'-gggagagagttcatccctga-3'     |
| <b>Tnfa</b>    | 5'-ccctcacactcagatcatcttct-3'    | 5'-gctacgacgtgggtacag-3'       |
| <b>Il-12b</b>  | 5'-ggaagcacggcagcagaata-3'       | 5'-aacttgagggagaagtaggaatgg-3' |
| <b>Ym1</b>     | 5'-gcagaagctctccagaagcaatcctg-3' | 5'-attggcctgtccttagccaactg-3'  |
| <b>Arg1</b>    | 5'-ttgggtggatgctcacactg-3'       | 5'-ttgccatgcagattccc-3'        |
| <b>Mcp-1</b>   | 5'-actcattcaccagcaagatg-3'       | 5'-ttaggttctgatctcattgg-3'     |
| <b>Cd68</b>    | 5'-ccaattcagggtggaagaaa-3'       | 5'-ctcgggctctgatgtaggtc-3'     |
| <b>Hmgcr</b>   | 5'-cttgtggaatgccttgattg-3'       | 5'-agccgaagcagcacatgat-3'      |
| <b>Il-6</b>    | 5'-agttgccttctgggactga-3'        | 5'-tccacgattccagagaac-3'       |
| <b>Ccl3</b>    | 5'-ttctctgtaccatgacactctg-3'     | 5'-cgtggaatctccggctgtag-3'     |
| <b>Icam-1</b>  | 5'-ctcggagacattagagaacaatgc-3'   | 5'-gggaccacggagccaatt-3'       |
| <b>Vcam-1</b>  | 5'-gcgttagtgggctgtctatctg-3'     | 5'-ctgaatacaaaacgatcgctcaa-3'  |
| <b>Sele</b>    | 5'-agctacccatggaacacgac-3'       | 5'-cgcaagttctccagctgtt-3'      |

***Human primer sequence***

|                |                               |                               |
|----------------|-------------------------------|-------------------------------|
| <b>ANGPTL4</b> | 5'-ctccactgggaccaggatca-3'    | 5'-atggctgcagggtgccaac-3'     |
| <b>ABCA1</b>   | 5'-gggtgatgttctgaccaatgtga-3' | 5'-tgtcctcataccagttgagagac-3' |
| <b>HMGCR</b>   | 5'-gtcattccagccaaggtgt-3'     | 5'-gggaccacttgcttcatta-3'     |

***Genotyping primers***

|                |    |                                |
|----------------|----|--------------------------------|
| <b>Angptl4</b> | P1 | 5'-gtgcaaccgtgaaacgcta-3'      |
|                | P2 | 5'-agccagcaagttcatctcgt-3'     |
|                | P3 | 5'-gacagtatcggcctcaggaa-3'     |
|                |    |                                |
| <b>Ldlr</b>    | P1 | 5'-gcgatggatacactcactgc-3'     |
|                | P2 | 5'-aatccatctgttcaatggccgatc-3' |
|                | P3 | 5'-ccatatgcatccccagtctt-3'     |

**Supplementary Table 1.** PCR primer sequences
